# Supplementary material
Source: publisher figshare collection journal article supplement (https://springernature.figshare.com/ndownloader/files/38034807)
Supplement: Supplementary file 1 [file 38034807]

## Sheet: Sheet1
	Ca	K	Mg	Na	Fe	Sn	Be	As	Al	V	Cr	Mn	Co	P	Mo	B	Ag	Cu	Zn	Se	Cd	Sb	Ba	Ti	S	Sr
	mg/L	mg/L	mg/L	mg/L	mg/L	ug/L	ug/L	ug/L	mg/L	ug/L	ug/L	mg/L	ug/L	mg/L	ug/L	mg/L	ug/L	mg/L	mg/L	ug/L	ug/L	ug/L	ug/L	ug/L	mg/L	ug/L
Con-1	1.72	0.592	0.578	4.128	0.133	0.1324	0.0307538	0.164	0.113	0.082	14.809	0.01	0.656	1.122	2.58114	0.4637	0.209	0.01	0.0088	0.234	0.108	0.047	4.818	9.718	0.217	0.003
Con-2	2.438	3.402	0.829	52.056	0.297	0.2079	0.0560166	0.056	0.106	0.073	13.498	0.008	0.533	1.674	1.18622	0.3519	0.069	0.016	0.0068	0.164	0.289	0.05	2.825	8.745	0.984	0.003
Con-3	1.108	3.262	0.773	48.687	0.199	0.2685	0	0.08	0.132	0.088	22.371	0.01	0.569	1.184	1.02112	0.3417	0.333	0.016	0.0104	0.175	0.328	0.03	0.788	6.173	1.353	0.002
Con-4	1.993	2.462	0.46	32.211	0.09	0.0841	0.0556015	0.09	0.086	0.049	12.104	0.008	0.477	1.317	1.13663	0.3243	0.154	0.015	0.009	0.115	0.102	0.03	1.701	7.463	0.798	0.001
CL-1	2.017	3.862	0.848	59.171	0.701	0.0697	0	0.163	0.087	0.029	7.808	0.007	0.42	1.645	1.18017	0.3348	0.067	0.017	0.0137	0.07	0.083	0.029	0.577	1.692	1.404	0.002
CL-2	0.867	4.492	0.452	72.526	0.085	0.066	0.0789724	0.07	0.097	-0.043	1.332	0.007	0.422	0.939	0.771927	0.2997	0.052	0.017	0.018	0.103	0.089	0.038	3.718	5.845	1.794	0.001
CL-3	2.253	3.802	0.848	58.048	0.246	0.0618	0.0264085	0.093	0.134	0.246	15.088	0.007	0.582	1.723	1.104	0.3103	0.202	0.016	0.015	0.206	0.12	0.032	4.488	1.987	0.779	0.002
CL-4	2.114	4.372	0.849	66.66	0.137	0.1817	0.0267273	0.124	0.097	0.037	8.092	0.008	0.573	1.695	1.33551	0.2847	0.08	0.019	0.0231	0.075	0.106	0.038	4.904	6.845	1.075	0.002
p value	0.996383	0.043997	0.521031	0.040473	0.474182	0.169623	0.901189	0.643419	0.709021	0.930058	0.080467	0.031933	0.35039	0.462853	0.36019	0.108083	0.211973	0.104219	0.0061	0.193995	0.123498	0.423826	0.522444	0.042015	0.235166	0.390259
fold change	0.998898	1.70076	1.13523	1.87045	1.62587	0.547265	0.927909	1.15385	0.949657	0.921233	0.514797	0.805556	0.893512	1.13309	0.741185	0.829846	0.524183	1.21053	1.99429	0.659884	0.481258	0.872611	1.35087	0.509954	1.50716	0.777778
log2(fold change)	-0.00159084	0.766181	0.182981	0.903385	0.701211	-0.869688	-0.107945	0.206451	-0.0745219	-0.118362	-0.957924	-0.311944	-0.16244	0.180268	-0.432094	-0.269084	-0.931858	0.275634	0.995872	-0.599716	-1.05512	-0.196589	0.433887	-0.971562	0.591832	-0.36257
